# Supplementary material for: Enhanced Stilbene Production and Excretion in Vitis vinifera cv Pinot Noir Hairy Root Cultures
Source: PubMed Central journal article supplement (PMC6273728; doi:10.3390/molecules21121703), 2016-12-10
Supplement: molecules-21-01703-s001.pdf [file molecules-21-01703-s001.pdf]

# Supplementary Materials: Enhanced Stilbene Production and Excretion in *Vitis vinifera* cv Pinot Noir Hairy Root Cultures

Leo-Paul Tisserant, Aziz Aziz, Nathalie Jullian, Philippe Jeandet, Christophe Clément, Eric Courrot and Michèle Boitel-Conti

## 1. Confirmation of the Transformation

The transformation of the selected hairy root lines was done by verification of the presence of the auxin-synthesis coding *rolC* gene and the absence of the virulence *virD2* bacterial gene. As shown in Figure S1; all 9 selected lines were confirmed to be transformed.

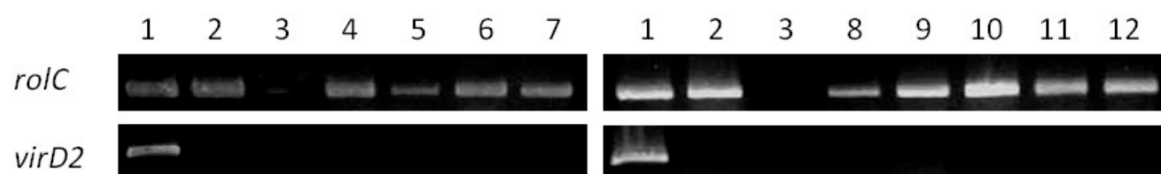

**Figure S1.** PCR confirmation of the transformation. (1) *R. rhizogenes* ATCC 15834 double positive control; (2) *Brassica rapa* hairy roots as a *rolC* positive control; (3) *Vitis vinifera* in vitro plantlet roots as double negative control. (4) Root line 19A; (5): Root line 16C; (6) Root line 18B; (7) Root line 13F; (8) Root line 19B; (9) Root line 16D; (10) Root line 3A; (11) Root line 13G; (12): Root line 28C.

## 2. Proportion of Different Excreted Stilbenes

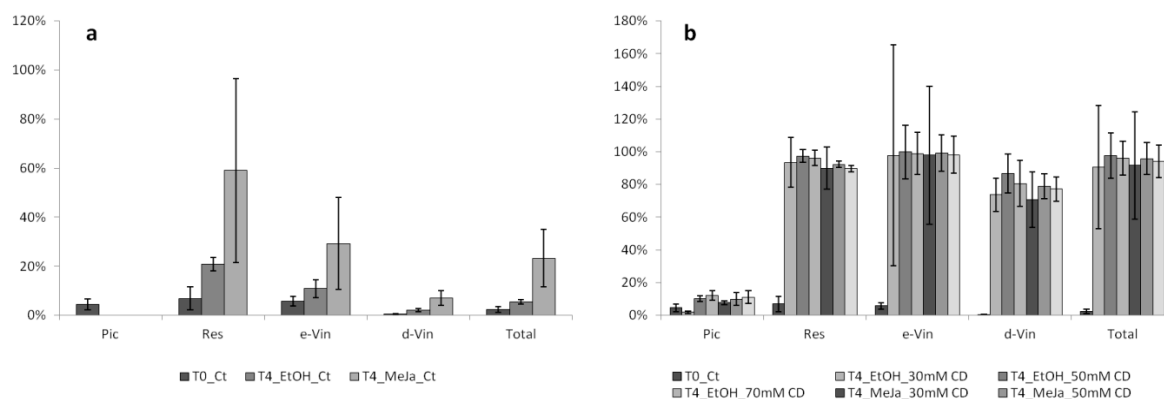

**Figure S2.** Proportion of each stilbene excreted in the culture medium over the sum of their intracellular and excreted amounts.

### 3. UPLC Chromatograms

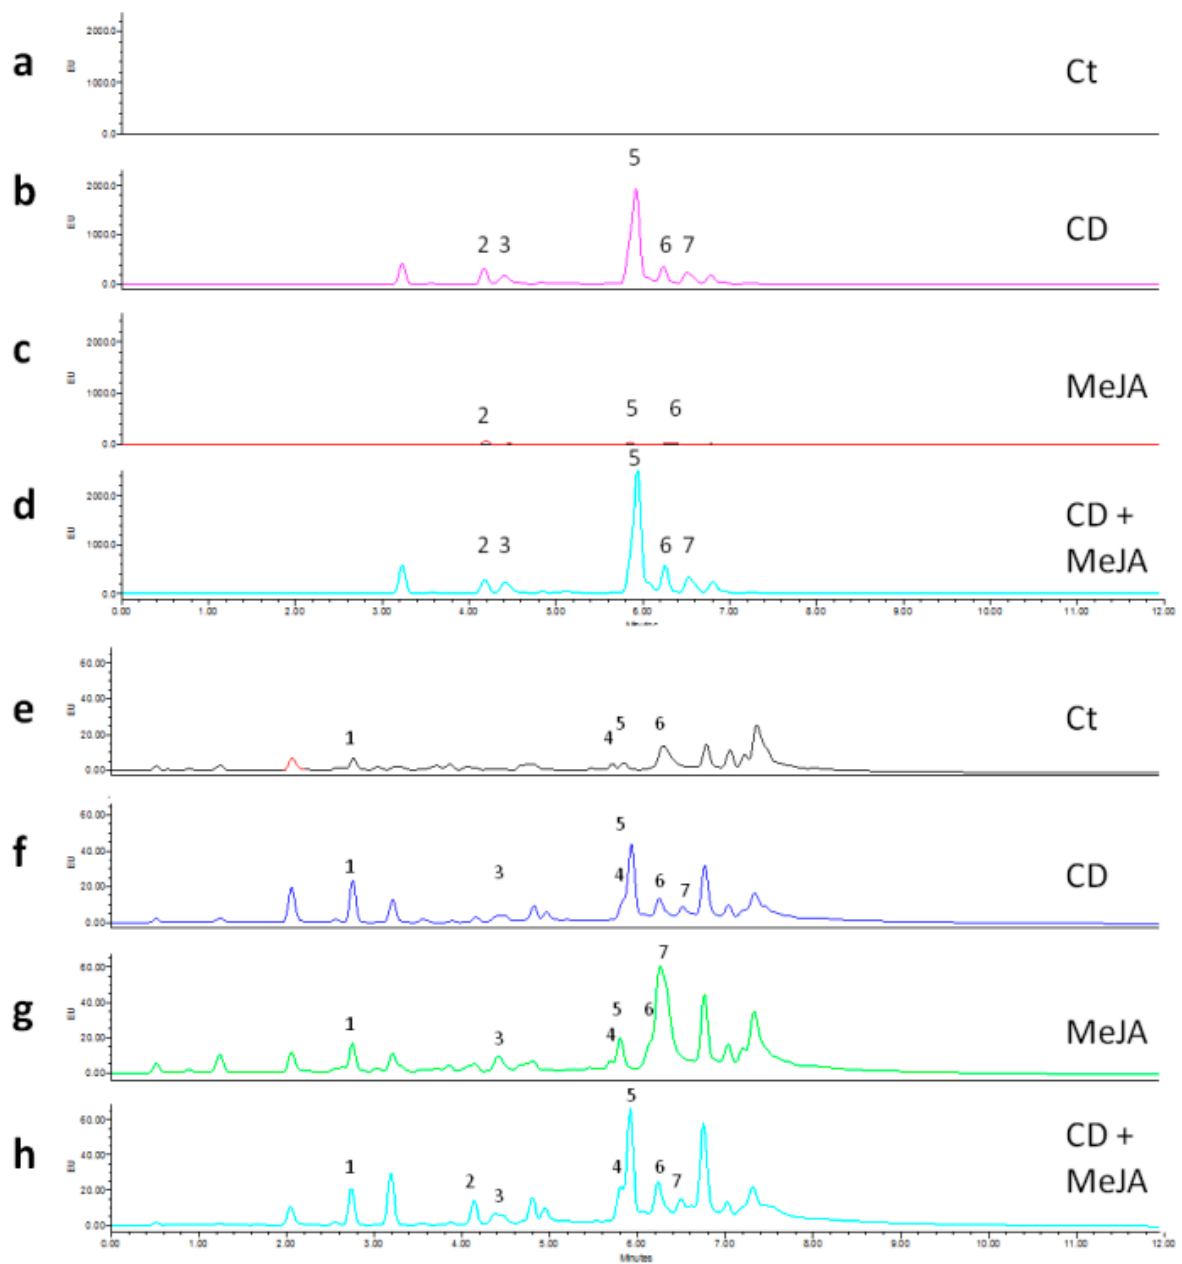

**Figure S3.** Examples of UPLC chromatograms for culture medium extracts (**a–d**) and root extracts 96 h after elicitation (**d–h**); for controls; 50 mM MCD; 100  $\mu$ M MeJA; and 100  $\mu$ M MeJA in combination with 50 mM MCD respectively. 1: t-piceid; 2: t-resveratrol; 3: c-resveratrol; 4: c- $\epsilon$ -viniferin; 5: t- $\epsilon$ -viniferin; 6: t- $\delta$ -viniferin; 7: c- $\delta$ -viniferin.

#### 4. Fold-Increase in Stilbene Production in Comparison to Controls

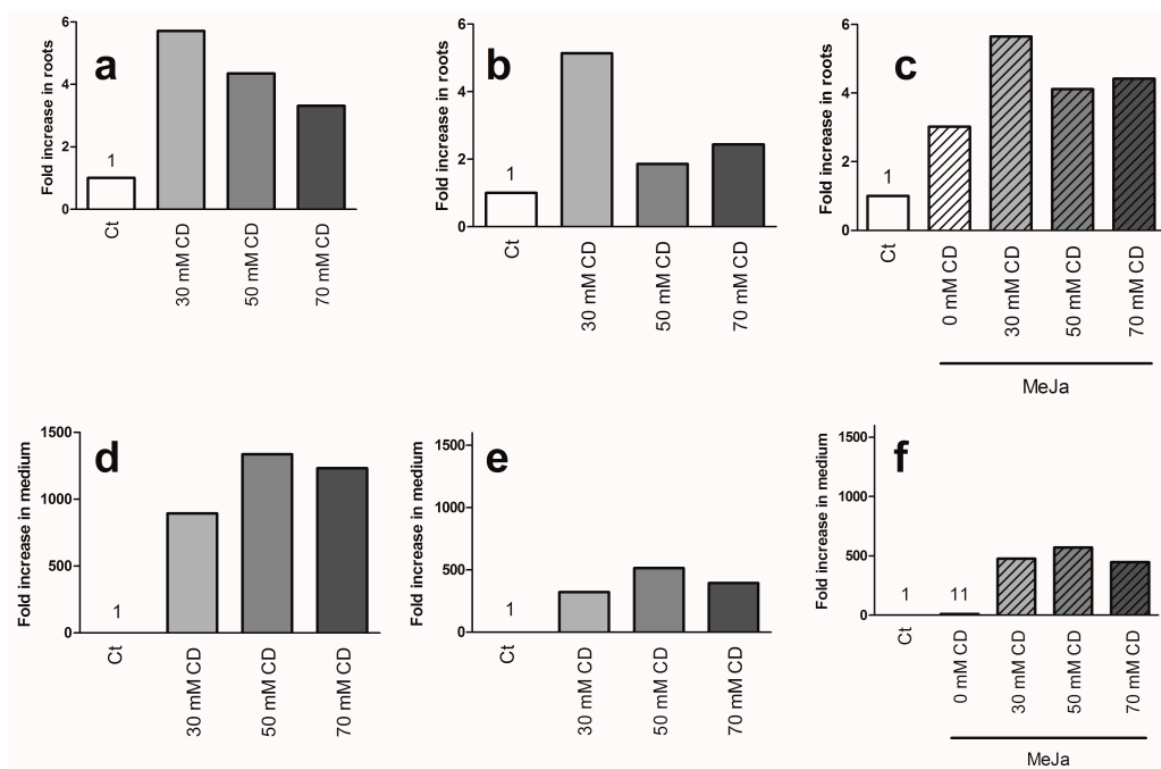

**Figure S4.** Relative amounts of total stilbenes quantified for each treatment in comparison to control. MCD concentrations tested were 0; 30; 50 and 70 mM. (a–c) Fold-increase in production of stilbenes in roots in comparison to control before induction; after 4 days without MeJA and after 4 days with 100 μM MeJA respectively; (d–f) Fold-increase in production of stilbenes in the culture medium in comparison to control before induction; after 4 days without MeJA and after 4 days with 100 μM MeJA respectively.
